# Supplementary material for: Generative AI and the future of writing for publication: insights from applied linguistics journal editors
Source: publisher site journal article supplement (doi:10.1515/applirev-2025-0021), 2025-07-23
Supplement: Supplementary file 1 [file j_applirev-2025-0021_suppl_001.docx]

**Appendix 1**

**Interview Guide**

**Background and Context**

1. **Professional Background**
   - Can you tell me about your professional background and role as a applied linguistics journal editor? (How long have you been an editor? Which journals? Why did you decide to become an editor?)

**Experiences of GenAI tools in academic writing and their editorial roles.**

- - How familiar are you with Generative AI technologies? Have you used or encountered them in your editorial work or wider professional research (e.g., research work, writing, teaching)?
  - Have you encountered examples of GenAI use in your editorial work? Can you describe them and your thoughts about them?

**Appropriate and inappropriate uses of GenAI in research and publication**

- What were your initial thoughts or reactions to the idea of using GenAI in academic publishing when you first encountered it?
- Have you your perception of the use of GenAI in academic publishing evolved over time? If so, how, and what factors influenced this change?
- What might be appropriate uses of GenAI in academic publishing (research process, writing, language editing, screening, reviewing)?
- What might be inappropriate uses of GenAI in academic publishing (research process, writing, language editing, screening, reviewing)?

**Journal editors’ roles in relation to GenAI in academic publishing.**

- What are the journal editors’ roles and responsibilities in relation to GenAI in academic publishing?
- What are the roles and responsibilities of authors, reviewers, and publishers?

**Perceived benefits and challenges of GenAI use in research and publication.**

- **Benefits and Opportunities**
  - What do you see as the potential benefits or opportunities of using GenAI in academic publishing?
  - Has your journal implemented any practices or tools that involve GenAI in its processes? How effective have they been?
- **Challenges and Concerns**
  - What challenges or concerns do you have regarding the use of GenAI in academic publishing?
  - What ethical concerns do you have regarding the use of GenAI academic publishing?

**Policies or guidelines regarding GenAI within their journals.**

- - Has your journal implemented any policies or guidelines regarding the use of GenAI? If so, what are they?
  - Many journals require authors to declare their use of GenAI in the process of writing a manuscript – do you agree with this policy? Do you believe authors are accurate with their reporting of us? Why? Why not?
  - How do you currently perceive the use of GenAI in the peer review process?
  - Many journals when sending review requests state that reviewers should not use GenAI as part of the review process – do you agree with this? Have you seen evidence of reviewers using GenAI to assist their review work? What are your thoughts on this?

**Training and Support**

- - What kind of training or support, if any, have you or your editorial team received on using GenAI tools? What might be worth providing?

**Concluding Thoughts**

- **Overall Impact**
  - Overall, how do you think the use of GenAI will impact the field of applied linguistics research and publication?
  - Do you think the use of GenAI in applied linguistics journals differs from its use in other academic disciplines? If so, how?
- **Advice for Editors**
  - What advice would you give to other journal editors in applied linguistics who are considering the integration of GenAI into their processes?
- **Additional Comments**
  - Is there anything else you would like to add about your experiences or thoughts on the use of GenAI in academic publishing?
